# Supplementary material for: Microfluidic radiosynthesis of [18F]FEMPT, a high affinity PET radiotracer for imaging serotonin receptors
Source: PubMed Central journal article supplement (PMC5753126; doi:10.3762/bjoc.13.285), 2017-12-29
Supplement: Beilstein_J_Org_Chem-13-2922-s001.pdf [file Beilstein_J_Org_Chem-13-2922-s001.pdf]

## Supporting Information

for

# Microfluidic radiosynthesis of [ $^{18}\text{F}$ ]FEMPT, a high affinity PET radiotracer for imaging serotonin receptors

Thomas Lee Collier<sup>1,2\*</sup>, Steven H. Liang<sup>1</sup>, J. John Mann<sup>3</sup>, Neil Vasdev<sup>2</sup> and J. S. Dileep Kumar<sup>3</sup>

Address: <sup>1</sup>Division of Nuclear Medicine and Molecular Imaging, Massachusetts General Hospital & Harvard Medical School, Boston, MA, USA, <sup>2</sup>Advion, Inc., Ithaca, NY, USA and <sup>3</sup>Molecular Imaging and Neuropathology Division, New York State Psychiatric Institute, New York, NY, USA

Email: Thomas Lee Collier - [tcollier@mgh.harvard.edu](mailto:tcollier@mgh.harvard.edu)

\* Corresponding author

## Experimental part

Synthesis of 2-(4-(4-(7-(2-fluoroethoxy)naphthalen-1-yl)piperazin-1-yl)butyl)-4-methyl-1,2,4-triazine-3,5(2*H*,4*H*)-dione (**7**)

1-Bromo-2-fluoroethane (26.4 mg, 0.208 mmol) and potassium carbonate (96 mg, 0.694 mmol) were added to the solution of 2-(4-(4-(6-hydroxypyridin-2-yl)piperazin-1-yl)butyl)-4-methyl-1,2,4-triazine-3,5(2*H*,4*H*)dione (**6**, 50 mg, 0.139 mmol) in DMF (2 mL). The reaction mixture was heated at 80 °C for 4 h. The reaction mixture was cooled to rt, diluted with water, extracted with ethyl acetate (3 × 30 mL). The combined organic layers were washed with brine, dried over MgSO<sub>4</sub> and concentrated under vacuum. The crude residue was column chromatographed using 2% methanol in CH<sub>2</sub>Cl<sub>2</sub> to give the compound **5** as a viscous liquid (38 mg, 70%).

<sup>1</sup>H NMR (400 MHz, CDCl<sub>3</sub>) δ 7.9 (d, 1H), 7.6 (m, 2H); 7.5 (s, 1H), 7.3 (m, 2H), 7.2 (dd, 1H), 7.1 (d, 1H), 4.87 – 4.80 (m, 1H), 4.75 – 4.67 (m, 1H), 4.34 – 4.26 (m, 1H), 4.25 – 4.16 (m, 1H), 4.02 (t, 2H), 3.4 (s, 3H), 3.2 (brs, 4H), 2.6 (brs, 4H), 2.4 (t, 2H), 1.86 – 1.74 (m, 2H), 1.59 (m, 2H); HRMS calcd for C<sub>24</sub>H<sub>30</sub>FO<sub>3</sub>N<sub>5</sub> (MH<sup>+</sup>): 456.2354; Found: 456.2268.

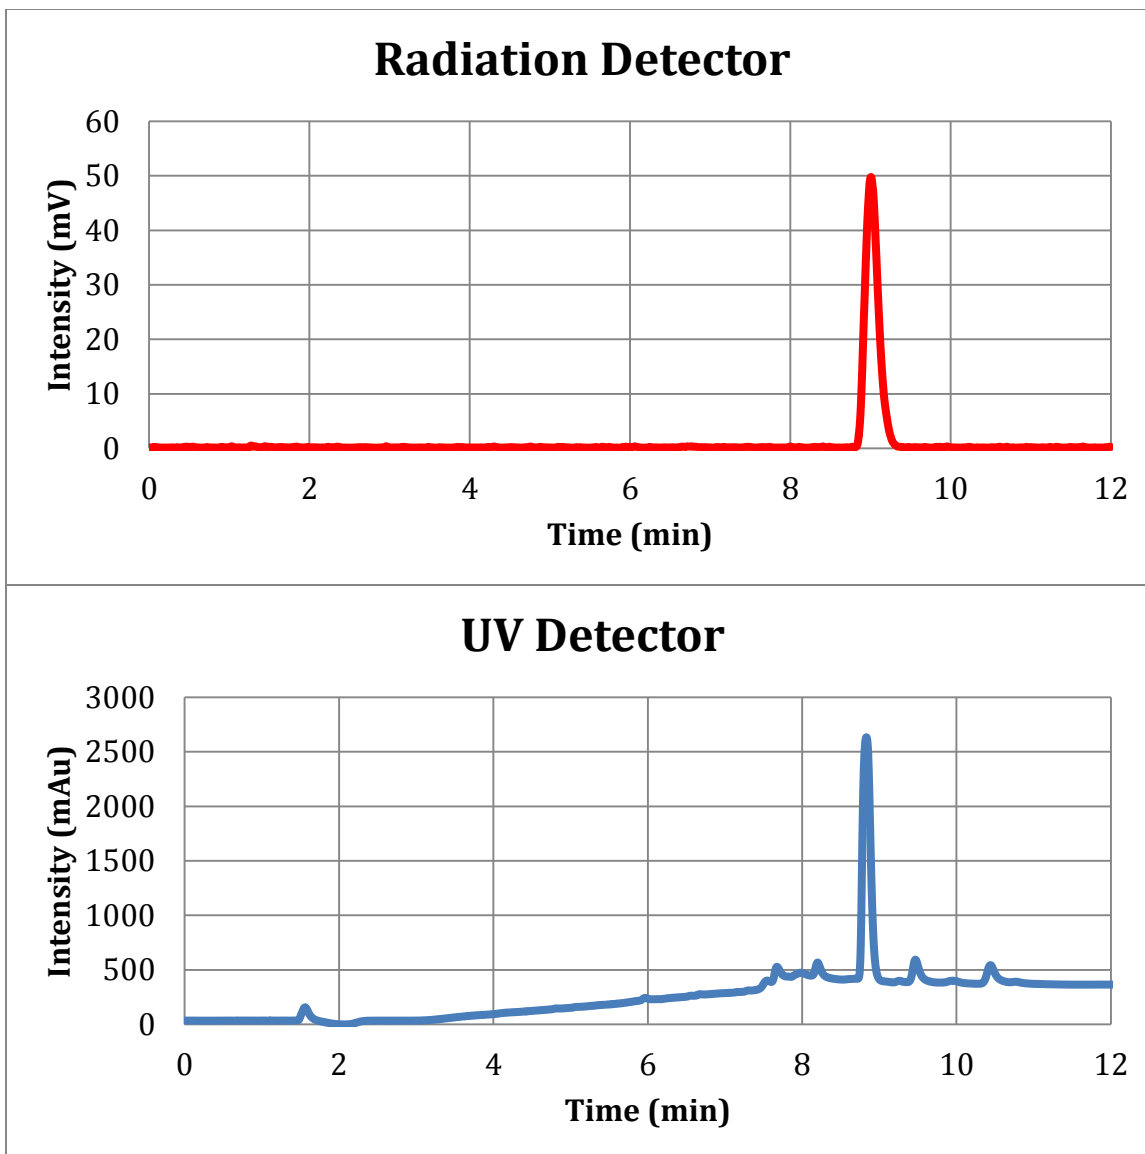

Column : 3  $\mu$ m, 4.6  $\times$  150 mm C18, Phenomenex, Luna.

Flow rate : 1mL/min,

Solvent : Acetonitrile : 0.1% formic acid,

Gradient: 0–1 min : 10% Acetonitrile : 0.1% formic acid  
 1–7 min : gradient to 95% Acetonitrile : 0.1% formic acid  
 7–11 min : 95% Acetonitrile : 0.1% formic acid  
 11–12 min : gradient to 10% Acetonitrile : 0.1% formic acid
